# Supplementary material for: MicroRNA Dysregulation in Early Breast Cancer Diagnosis: A Systematic Review and Meta-Analysis
Source: MDPI journal article supplement (doi:10.3390/ijms24098270), 2023-05-05
Supplement: s1 [file s1]

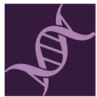

*Supplementary Materials*

# MicroRNA Dysregulation in Early Breast Cancer Diagnosis: A Systematic Review and Meta-Analysis

Alejandro Garrido-Palacios, Iñigo María Perez-Castillo, Ana María Núñez-Negrillo,  
Jonathan Cortés-Martín, Juan Carlos Sánchez-García and María José Aguilar-Cordero

**Supplementary Table S1.** Evaluation of risk of bias Newcastle-Ottawa Scale (case-control design).

| Reference | Design       | Selection | Comparability | Exposure | Total |
|-----------|--------------|-----------|---------------|----------|-------|
| [15]      | Case-Control | ★★★       | ★★            | ★★★      | 8/9   |
| [16]      | Case-Control | ★★★★      | ★★            | ★★★      | 9/9   |
| [17]      | Case-Control | ★★★★      | ★★            | ★★★      | 9/9   |
| [18]      | Case-Control | ★★★       | ★★            | ★★★      | 8/9   |
| [19]      | Case-Control | ★         | ★             | ★★★      | 5/9   |
| [20]      | Case-Control | ★★★★      | ★★            | ★★★      | 9/9   |
| [21]      | Case-Control | ★★★       | ★             | ★★★      | 7/9   |
| [22]      | Case-Control | ★★★       | ★★            | ★★★      | 8/9   |
| [23]      | Case-Control | ★★★★      | ★★            | ★★★      | 9/9   |
| [24]      | Case-Control | ★★★       | ★★            | ★★       | 7/9   |
| [25]      | Case-Control | ★★★★      | ★             | ★★★      | 8/9   |
| [26]      | Case-Control | ★★★★      | ★★            | ★★★      | 9/9   |
| [27]      | Case-Control | ★★★★      | ★             | ★★★      | 8/9   |
| [28]      | Case-Control | ★★★       | ★★            | ★★★      | 7/9   |
| [29]      | Case-Control | ★★★★      | ★★            | ★★★      | 9/9   |
| [49]      | Case-Control | ★★★★      | ★★            | ★★★      | 9/9   |

---

|      |              |      |    |      |     |
|------|--------------|------|----|------|-----|
| [94] | Case-Control | ★★★★ | ★★ | ★★★★ | 9/9 |
| [30] | Case-Control | ★★★★ | ★★ | ★★★★ | 9/9 |
| [45] | Case-Control | ★★★★ | ★  | ★★★★ | 8/9 |
| [31] | Case-Control | ★★★★ | ★★ | ★★★★ | 9/9 |
| [32] | Case-Control | ★★★  | ★  | ★★★★ | 7/9 |
| [33] | Case-Control | ★★★  | ★★ | ★★★★ | 7/9 |
| [34] | Case-Control | ★★★★ | ★★ | ★★★★ | 9/9 |
| [40] | Case-Control | ★★   | ★  | ★★★★ | 6/9 |
| [36] | Case-Control | ★★★★ | ★★ | ★★   | 8/9 |
| [37] | Case-Control | ★★★  | ★★ | ★★   | 7/9 |
| [38] | Case-Control | ★★★  | ★★ | ★★★★ | 8/9 |
| [39] | Case-Control | ★★★★ | ★★ | ★★★★ | 9/9 |
| [40] | Case-Control | ★★★★ | ★★ | ★★   | 7/9 |
| [41] | Case-Control | ★★   | ★★ | ★★★★ | 7/9 |
| [42] | Case-Control | ★★★  | ★★ | ★★   | 7/9 |
| [43] | Case-Control | ★★★  | ★★ | ★★   | 7/9 |
| [44] | Case-Control | ★★   | ★★ | ★★★★ | 9/9 |

Criteria chosen for quality assessment of case-control studies.

| Selection                        | Acceptable                                                                                                                                                 |
|----------------------------------|------------------------------------------------------------------------------------------------------------------------------------------------------------|
| Is the case definition adequate? | The cases are obtained from medical records, diagnosed by the hospital team or independently validated.                                                    |
| Representativeness of the cases  | Representative of the average number of breast cancer patients in the community (only studies targeting patients with primary breast cancer were included) |
| Selection of controls            | The controls come from the same community.                                                                                                                 |
| Definition of controls           | The participants declare that they have no history of disease.                                                                                             |

  

| Comparability                                                                              | Acceptable                                                                                                                                                                                                                                                                                                                                                                                     |
|--------------------------------------------------------------------------------------------|------------------------------------------------------------------------------------------------------------------------------------------------------------------------------------------------------------------------------------------------------------------------------------------------------------------------------------------------------------------------------------------------|
| Cases and controls are compared according to the design or analysis included in the study. | <p>Both cases and controls are matched, or the result has been adjusted for 2-3 of the selected confounders (1 star).</p> <p>Both cases and controls match, or the result has been adjusted for 4 or more of the selected confounders (2 stars).</p> <p>Selected confounders: age, ethnicity/race, ER status, PR status, HER2 status, histologic grade, stage, biological sample, country.</p> |

| <b>Exposure</b>                                  | <b>Acceptable</b>                                                                      |
|--------------------------------------------------|----------------------------------------------------------------------------------------|
| Was the exposure determined?                     | MicroRNA analysis was performed using a validated method (eg, RT-qPCR, microarray...). |
| Was the same method used for cases and controls? | Yes                                                                                    |
| Unnecessary exclusion of participants            | There is no unnecessary exclusion of participants.                                     |

| <b>Study</b> | <b>Source</b> | <b>Country</b> | <b>Ethnicity</b> | <b>QUADAS Score</b> | <b>Endogenous control</b> | <b>RNA extraction</b> | <b>Median age BC patients</b> |
|--------------|---------------|----------------|------------------|---------------------|---------------------------|-----------------------|-------------------------------|
| [47]         | Serum         | Germany        | Caucasian        | 8                   | miR-16                    | total RNA             | 65                            |
| [49]         | Urine         | Switzerland    | Caucasian        | 8                   | miR-16                    | small RNA molecules   | 52                            |
| [24]         | Serum         | Mexico         | Caucasian        | 7                   | 18S RNA                   | small RNA molecules   | 52                            |
| [37]         | Serum         | Egypt          | Caucasian        | 8                   | miR-16                    | total RNA             | 50                            |
| [18]         | Serum         | China          | Asian            | 7                   | miR-16                    | total RNA             | 51                            |
| [19]         | Serum         | China          | Asian            | 8                   | RNU38B                    | total RNA             | 54                            |
